# Supplementary material for: Response of G-NUMEN LaBr3(Ce) Detectors to High Counting Rates
Source: Preprints.org preprint supplement (doi:10.20944/preprints202307.0575.v1), 2023-07-10
Supplement: Supplementary file 1 [file supplementary]

## Sheet: Sheet1
Author	e-mail
Elisa Maria Gandolfo1,2	emgandolfo@gmail.com
José Roberto Brandao Oliveira3	zero@if.usp.br
Luigi Campajola1,2	luigi.campajola@unina.it
Dimitra Pierroutsakou2	pierroutsakou@na.infn.it
Alfonso Boiano2	boiano@na.infn.it
Clementina Agodi4	agodi@lns.infn.it
Francesco Cappuzzello4	cappuzzello@lns.infn.it
Diana Carbone4	carboned@lns.infn.it
Manuela Cavallaro4	manuela.cavallaro@lns.infn.it
Irene Ciraldo4	ireneciraldo@gmail.com
Daniela Calvo5,	calvo@to.infn.it
Franck Delaunay4,6,7	delaunay@lpccaen.in2p3.fr
Canel Eke8	caneleke@hotmail.com
Fabio Longhitano9	fabio.longhitano@ct.infn.it
Nilberto Medina10	medina@if.usp.br
Mauricio Moralles10	mmoralles@gmail.com
Diego Sartirana5	diego.sartirana@to.infn.it
Vijay Sharma11	phy.vijayraj@gmail.com
Alessandro Spatafora4	Alessandro.spatafora@lns.infn.it
Dennis Toufen12	dennis.toufen@gmail.com
Paolo Finocchiaro4,*	finocchiaro@lns.infn.it
		1	Department of Physics “Ettore Pancini” - University of Napoli Federico II, Napoli, Italy;
		2	INFN – Sezione di Napoli, Napoli, Italy;
		3	Instituto de Física da Universidade de São Paulo, São Paulo, Brazil;
		4	INFN – Laboratori Nazionali del Sud, Catania, Italy;
		5	INFN – Sezione di Torino, Torino, Italy;
		6	Department of Physics “Ettore Majorana”, University of Catania, Catania, Italy;
		7	LPC Caen UMR 6534, Université de Caen Normandie, ENSICAEN, CNRS/IN2P3, F-14000 Caen, France;
		8	Department of Mathematics and Science Education, Faculty of Education, Akdeniz University, Antalya, Turkey;
		9	INFN – Sezione di Catania, Catania, Italy
		10	Instituto de Pesquisas Energéticas e Nucleares, IPEN/CNEN, São Paulo, SP, Brazil
		11	Department of Radiation Oncology, University of Maryland, Baltimore, MD, USA;
		12	Federal Institute of Education, Science and Technology of São Paulo, 07115-000 Guarulhos, São Paulo, Brazil
	*	Correspondence: finocchiaro@lns.infn.it
